# Supplementary material for: A genetic variant in SLC28A3, rs56350726, is associated with progression to castration-resistant prostate cancer in a Korean population with metastatic prostate cancer
Source: PubMed Central journal article supplement (PMC5722531; doi:10.18632/oncotarget.18298), 2017-05-30
Supplement: oncotarget-08-96893-s001.pdf [file oncotarget-08-96893-s001.pdf]

# A genetic variant in SLC28A3, rs56350726, is associated with progression to castration-resistant prostate cancer in a Korean population with metastatic prostate cancer

## Supplementary Materials

### MATERIALS AND METHODS

#### Abbreviations

Castration-resistant prostate cancer: CRPC; Androgen-deprivation therapy: ADT; Prostate cancer: PCa; Metastatic prostate cancer: mPCa; Single nucleotide polymorphism: SNP; Next-generation sequencing: NGS; Computed tomography: CT; Magnetic Resonance

Imaging: MRI; Prostate Specific Antigen: PSA; Trans-Rectal Ultrasound: TRUS; Deoxyribonucleic acid: DNA; Minor allele frequency: MAF; Principal components analysis: PCA; Principal component: PC; Identical-by-descent: IBD; Linkage disequilibrium: LD; Hardy-Weinberg equilibrium: HWE; Odds ratio: OR; Kaplan-Meier: K-M; Body mass index: BMI

**Supplementary Table 1: Logistic regression analysis of SNPs with the risk of metastatic PCa**

| SNPID       | Chromosome | Alleles | Gene        | Minor Allele Frequency |          | OR (95% CI)             | p-value   |
|-------------|------------|---------|-------------|------------------------|----------|-------------------------|-----------|
|             |            |         |             | Class 1                | Class 2  |                         |           |
| rs2241714   | 19         | C>T     | B9D2        | 0.2125                 | 0.4979   | 3.672 (2.123–6.349)     | 0.0000325 |
| rs143790069 | 15         | G>A     | THBS1       | 0.1098                 | 0.01778  | 0.1509 (0.068–0.3347)   | 0.0000329 |
| rs72821581  | 6          | T>C     | TMEM14B     | 0.08537                | 0.01356  | 0.1354 (0.05492–0.3336) | 0.0000139 |
| rs75992542  | 9          | A>G     | RABGAP1     | 0.1098                 | 0.02453  | 0.2027 (0.09368–0.4385) | 0.0000504 |
| rs56350726  | 9          | T>A     | SLC28A3     | 0.2195                 | 0.08133  | 0.3256 (0.1884–0.5627)  | 0.0000583 |
| rs10868138  | 9          | T>C     | SLC28A3     | 0.2073                 | 0.07873  | 0.3287 (0.1866–0.5791)  | 0.0001178 |
| rs1555300   | 20         | A>G     | RIMS4       | 0.6463                 | 0.4248   | 0.413 (0.2609–0.654)    | 0.0001627 |
| rs4819522   | 22         | C>T     | TBX1        | 0.2317                 | 0.09645  | 0.3588 (0.2095–0.6144)  | 0.0001876 |
| rs795791    | 15         | A>C     | TEX9,MNS1   | 0.1951                 | 0.4062   | 2.917 (1.66–5.123)      | 0.0001961 |
| rs12280680  | 11         | G>A     | CREB3L1     | 0.1951                 | 0.07612  | 0.3243 (0.1785–0.589)   | 0.0002173 |
| rs3785522   | 17         | G>A     | TBCD        | 0.1463                 | 0.04854  | 0.2728 (0.137–0.543)    | 0.0002174 |
| rs146571920 | 15         | A>C     | CASC5       | 0.07317                | 0.01408  | 0.169 (0.06557–0.4356)  | 0.0002328 |
| rs146933458 | 2          | C>T     | KIF5C       | 0.1585                 | 0.05683  | 0.2762 (0.1389–0.5492)  | 0.0002437 |
| rs10437653  | 11         | A>C     | .           | 0.1951                 | 0.07716  | 0.3284 (0.1807–0.5967)  | 0.0002577 |
| rs1190788   | 6          | G>A     | AKAP7       | 0.06098                | 0.009906 | 0.1455 (0.05145–0.4117) | 0.0002803 |
| rs7674577   | 4          | G>A     | .           | 0.09756                | 0.2891   | 3.936 (1.867–8.298)     | 0.0003177 |
| rs146536550 | 1          | C>G     | ZZZ3        | 0.07317                | 0.01199  | 0.1995 (0.08218–0.4842) | 0.0003669 |
| rs1935881   | 1          | A>G     | .           | 0.2439                 | 0.1077   | 0.3953 (0.2369–0.6596)  | 0.0003816 |
| rs17410015  | 1          | T>C     | .           | 0.07317                | 0.01512  | 0.1819 (0.07094–0.4664) | 0.0003888 |
| rs9376092   | 6          | C>A     | .           | 0.5732                 | 0.37     | 0.4491 (0.2884–0.6995)  | 0.0003985 |
| rs9402686   | 6          | G>A     | .           | 0.5732                 | 0.3707   | 0.451 (0.2897–0.702)    | 0.0004211 |
| rs4895441   | 6          | A>G     | .           | 0.5732                 | 0.3707   | 0.451 (0.2897–0.702)    | 0.0004211 |
| rs17747633  | 15         | A>G     | CASC5,CASC5 | 0.1463                 | 0.04901  | 0.3191 (0.1691–0.6025)  | 0.0004266 |
| rs9373124   | 6          | T>C     | .           | 0.5732                 | 0.3711   | 0.4515 (0.29–0.7029)    | 0.0004308 |
| rs586024    | 6          | A>G     | GPR116      | 0.06098                | 0.01095  | 0.1612 (0.05752–0.4518) | 0.0005181 |
| rs10152546  | 15         | T>A     | C15orf57    | 0.1463                 | 0.05005  | 0.3246 (0.1719–0.613)   | 0.0005228 |
| rs7784776   | 7          | G>A     | .           | 0.4268                 | 0.2492   | 0.4564 (0.2922–0.7128)  | 0.0005634 |
| rs11253684  | 10         | G>A     | .           | 0.1098                 | 0.03233  | 0.263 (0.123–0.562)     | 0.0005672 |
| rs147272153 | 19         | G>A     | PHLDB3      | 0.07317                | 0.0146   | 0.2036 (0.08216–0.5046) | 0.0005885 |
| rs690347    | 15         | G>T     | ZFYVE19     | 0.1707                 | 0.06569  | 0.3468 (0.1894–0.6351)  | 0.0006026 |
| rs139626065 | 5          | C>T     | GPR151      | 0.06098                | 0.01147  | 0.1691 (0.06056–0.4719) | 0.0006888 |
| rs150152777 | 20         | T>G     | C20orf152   | 0.06098                | 0.01147  | 0.1691 (0.06056–0.4719) | 0.0006888 |
| rs41273541  | 1          | T>C     | OR6N2       | 0.3293                 | 0.1794   | 0.429 (0.2622–0.702)    | 0.0007558 |
| rs3739040   | 2          | C>T     | LRRFIP1     | 0.2073                 | 0.0902   | 0.3873 (0.2224–0.6743)  | 0.0007993 |
| rs3739039   | 2          | A>G     | LRRFIP1     | 0.2073                 | 0.0902   | 0.3873 (0.2224–0.6743)  | 0.0007993 |
| rs74530614  | 19         | C>A     | FFAR1       | 0.09756                | 0.02815  | 0.2461 (0.1084–0.5587)  | 0.0008027 |
| rs7460258   | 8          | C>T     | .           | 0.4634                 | 0.2865   | 0.4641 (0.2962–0.7272)  | 0.0008059 |
| rs17167553  | 7          | G>T     | LRGUK       | 0.5                    | 0.3227   | 0.4581 (0.2895–0.7248)  | 0.0008547 |
| rs2229889   | 20         | C>T     | RRBP1       | 0.07317                | 0.01566  | 0.2163 (0.08777–0.5329) | 0.0008757 |
| rs9606756   | 22         | A>G     | TCN2,TCN2   | 0.06098                | 0.01199  | 0.1769 (0.06362–0.492)  | 0.0009032 |
